# Supplementary material for: Ultrasensitive and Multiplexed Protein Imaging with Cleavable Fluorescent Tyramide and Antibody Stripping
Source: MDPI journal article supplement (doi:10.3390/ijms22168644), 2021-08-11
Supplement: s1 [file s1]

## Supplementary Material

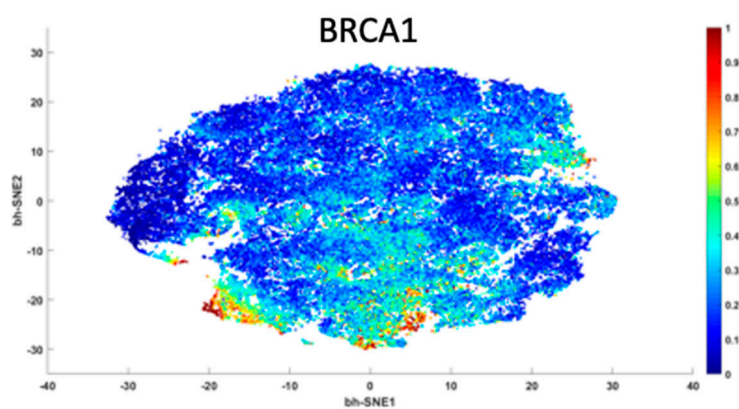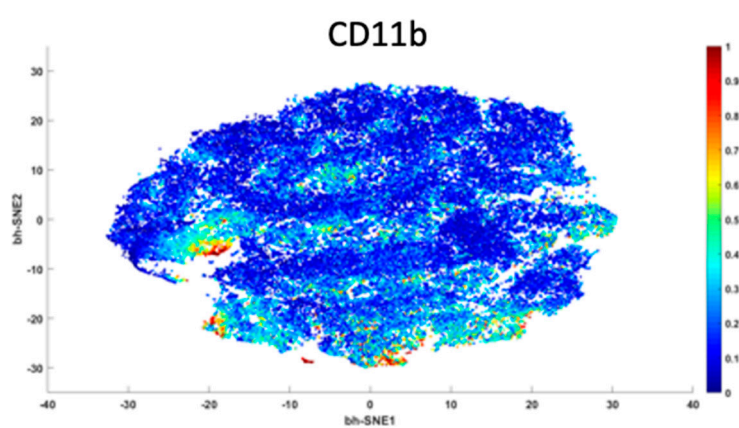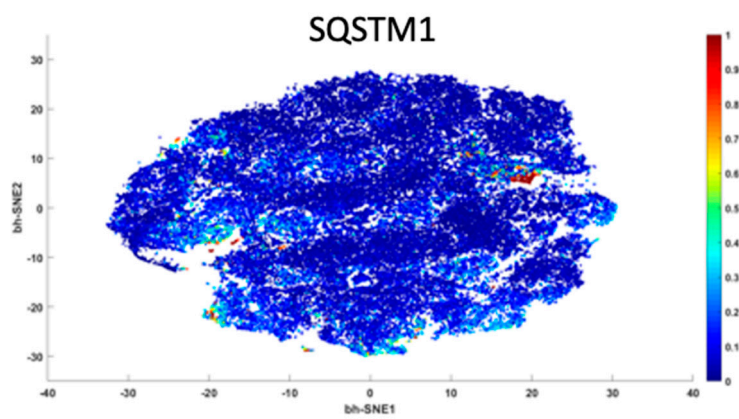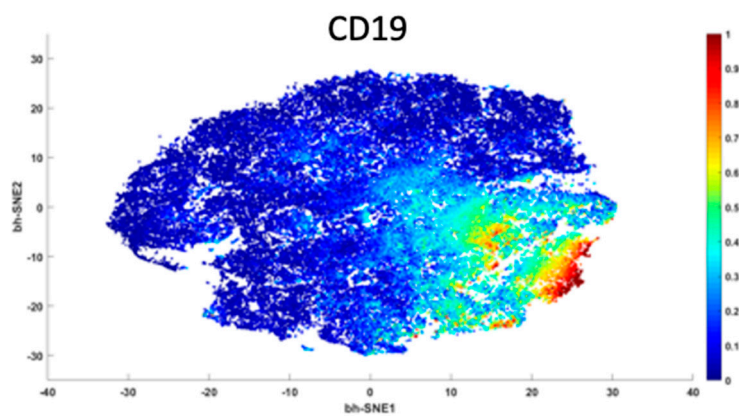

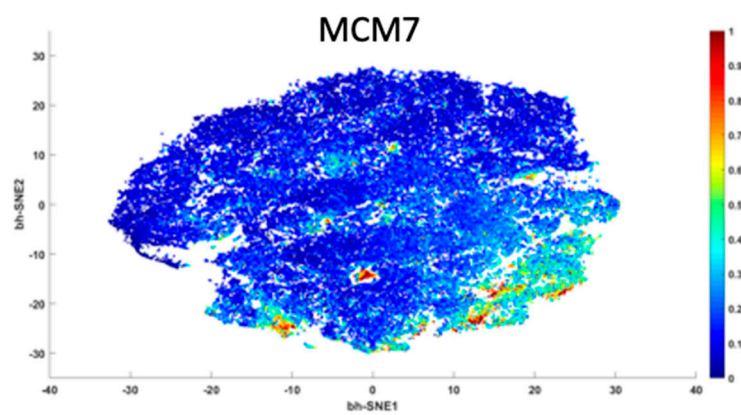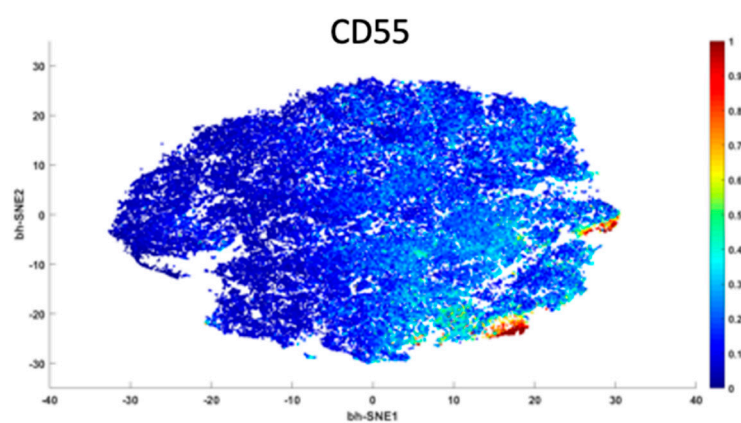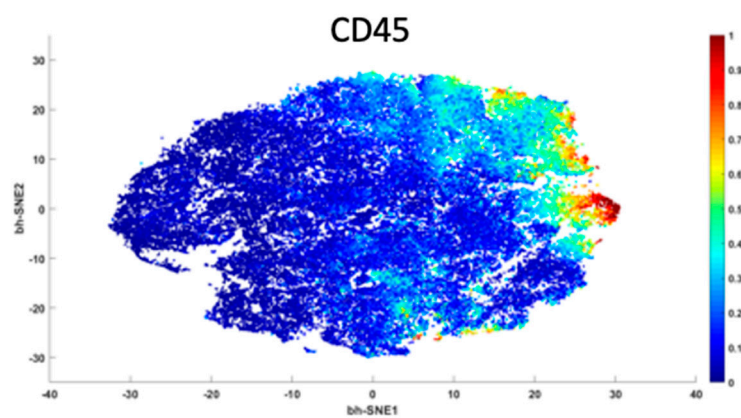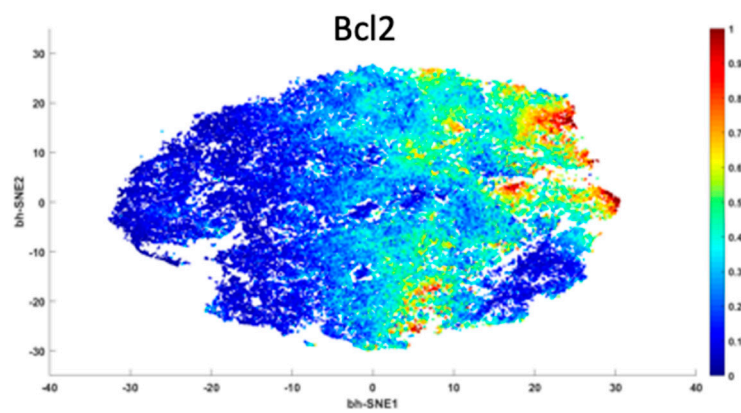

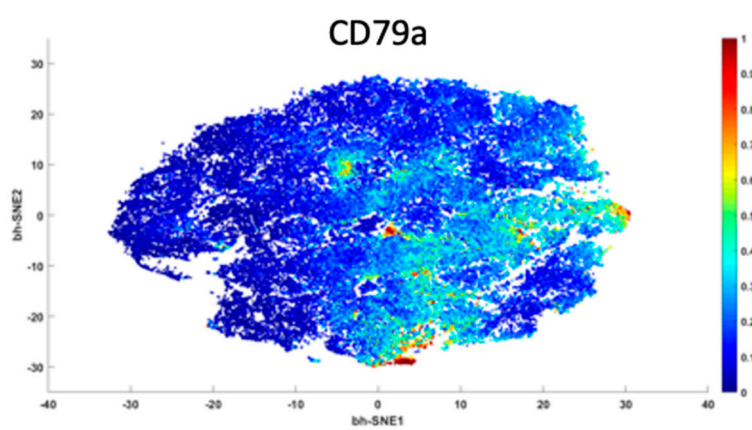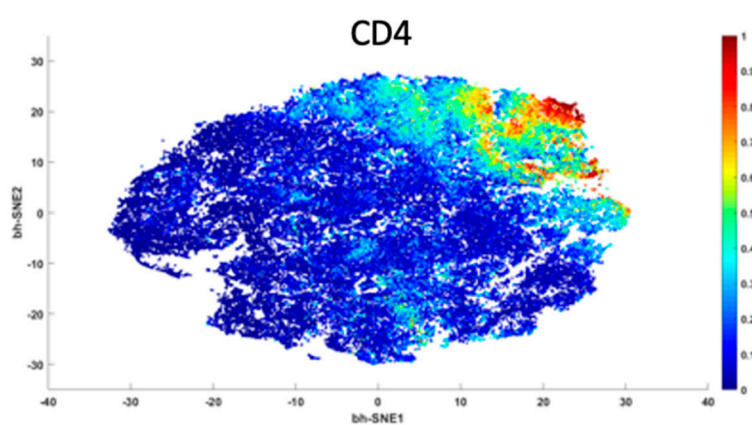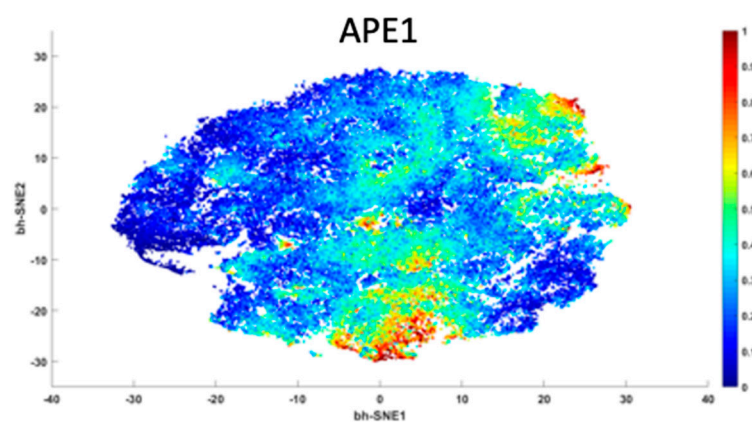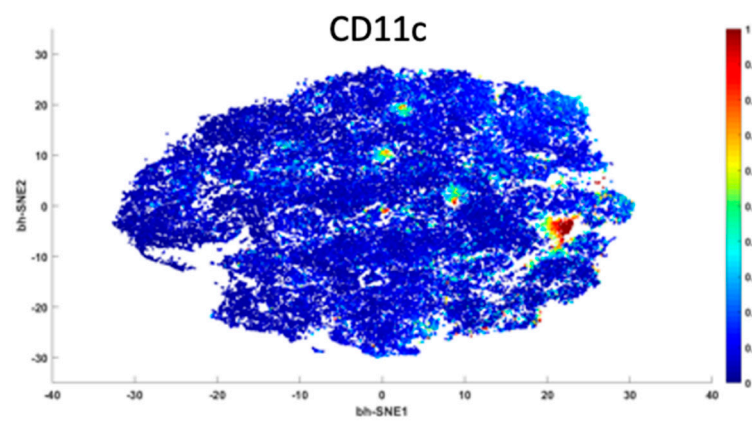



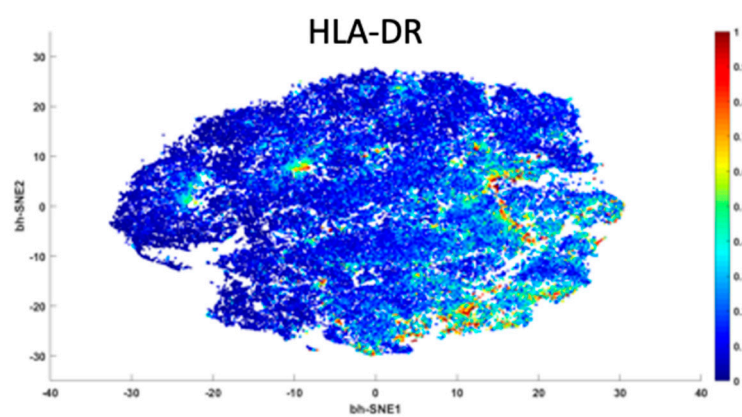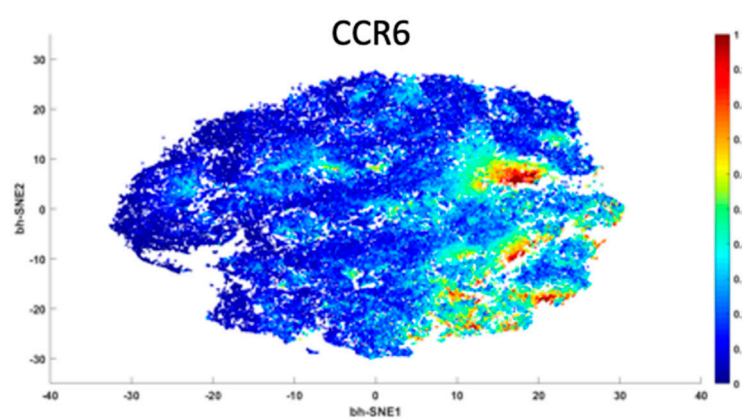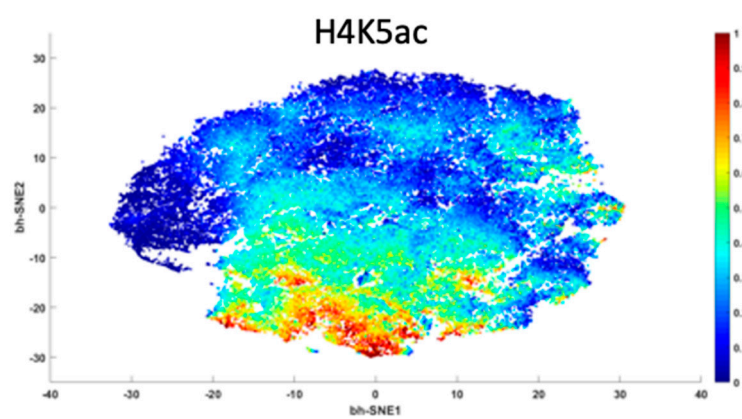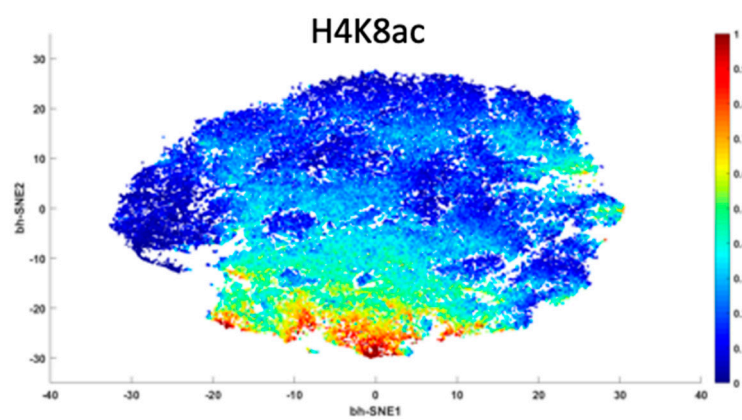

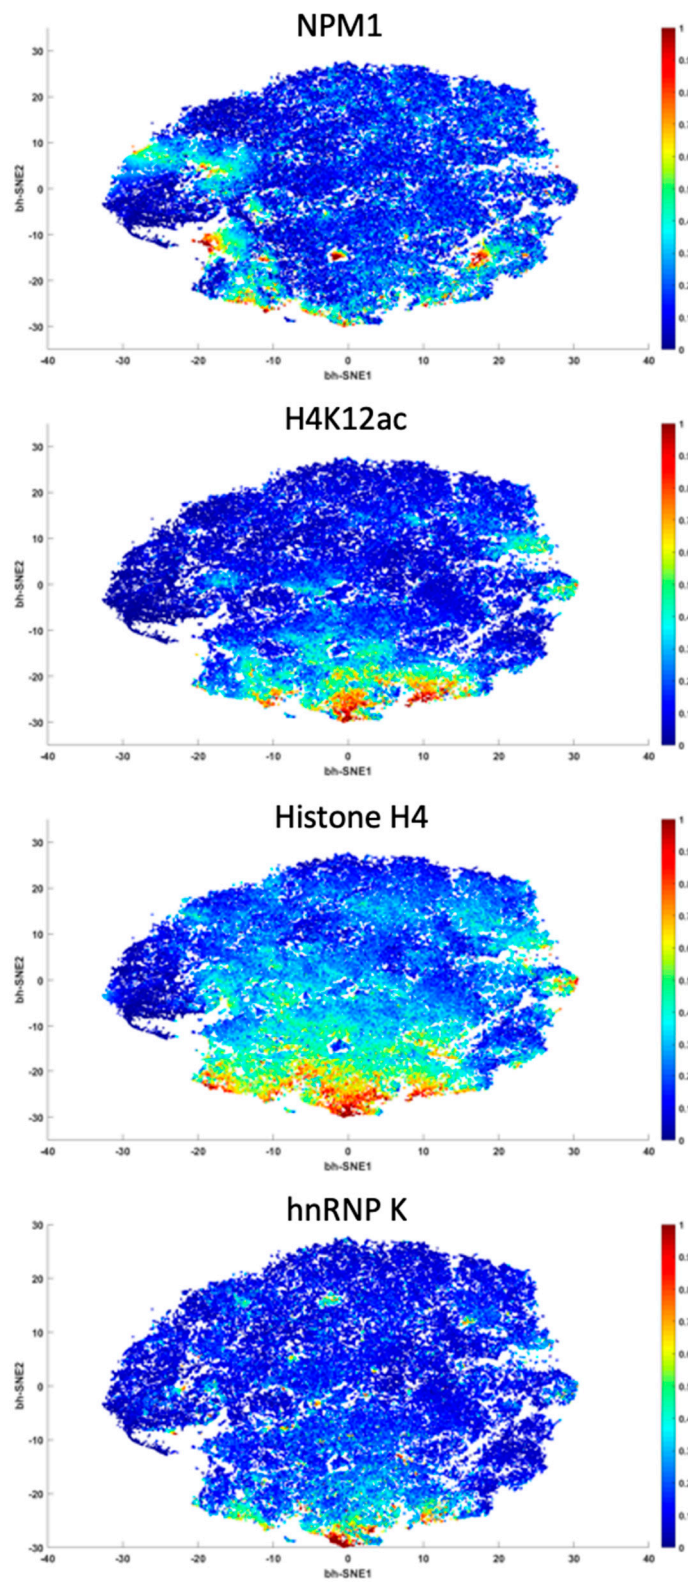

**Figure S1.** Single cell protein expression distribution in viSNE plots.

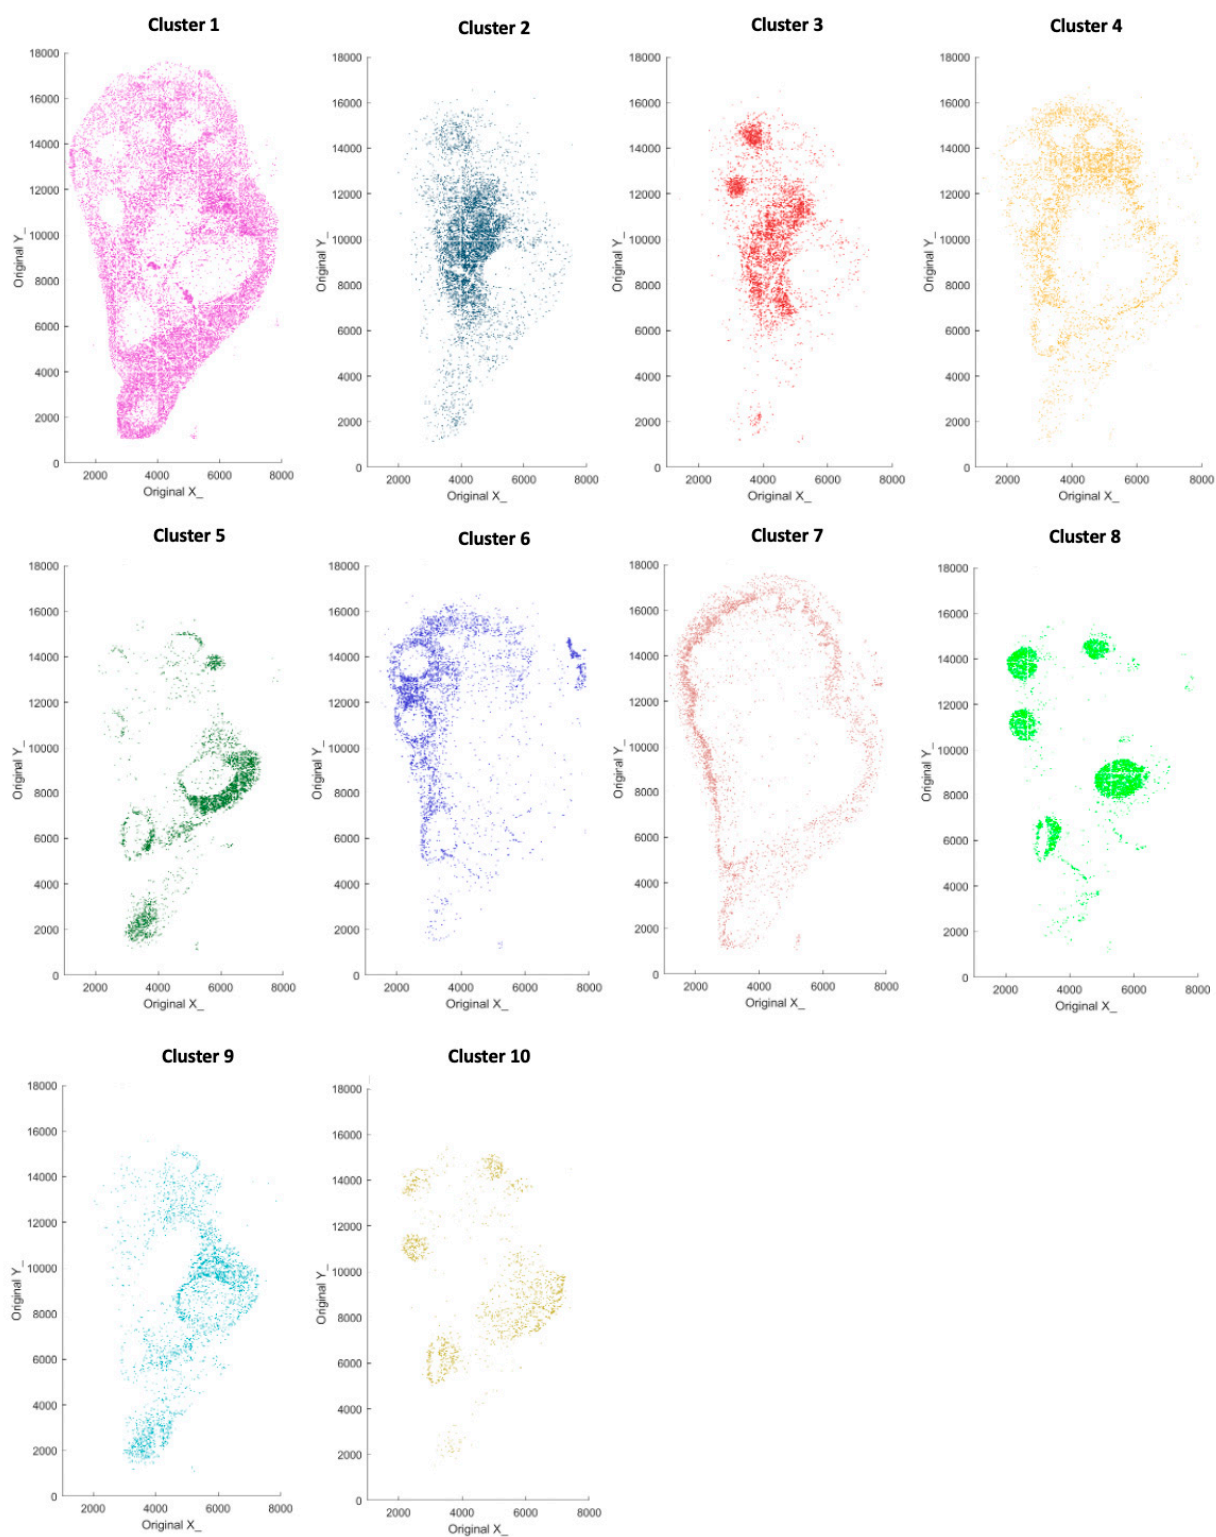

**Figure S2.** Anatomical locations of the individual cells from the 10 different cell clusters.

### Cell cluster 1

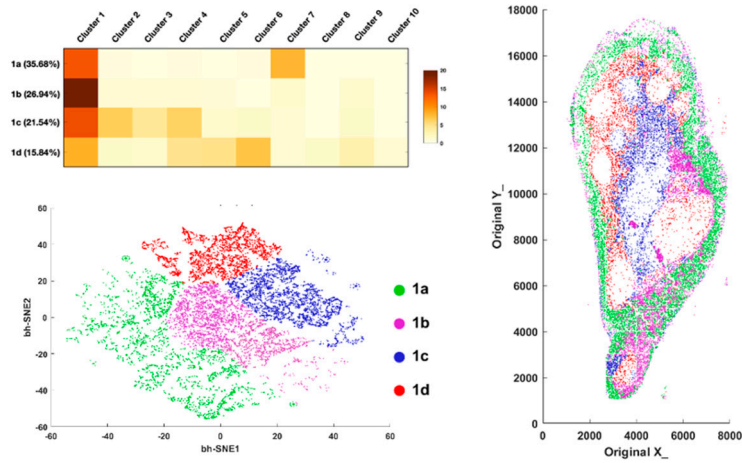

### Cell cluster 2

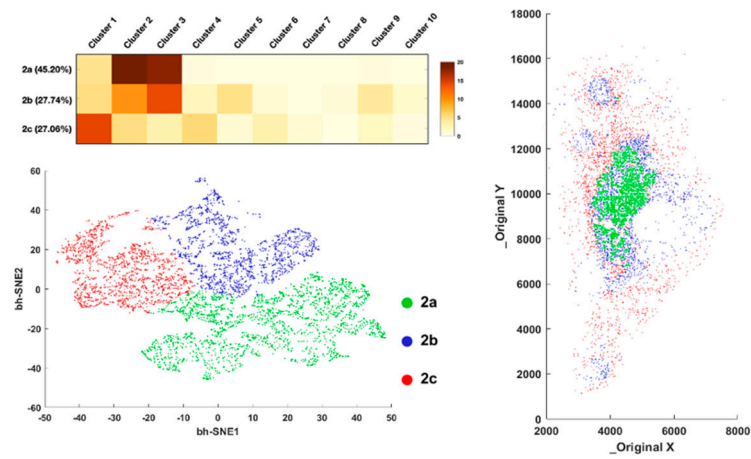

### Cell cluster 3

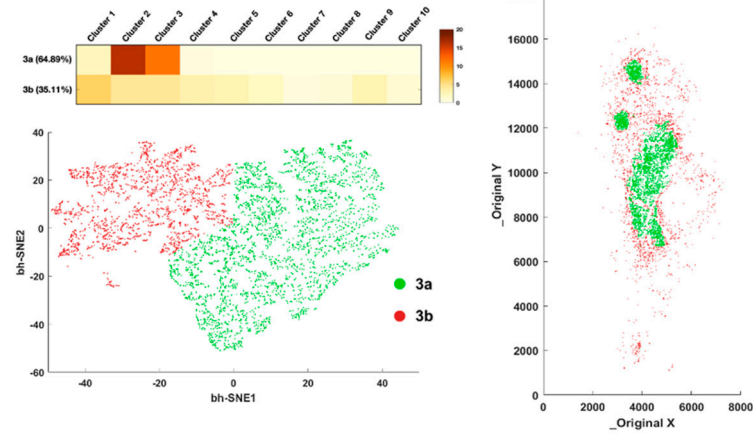



### Cell cluster 4

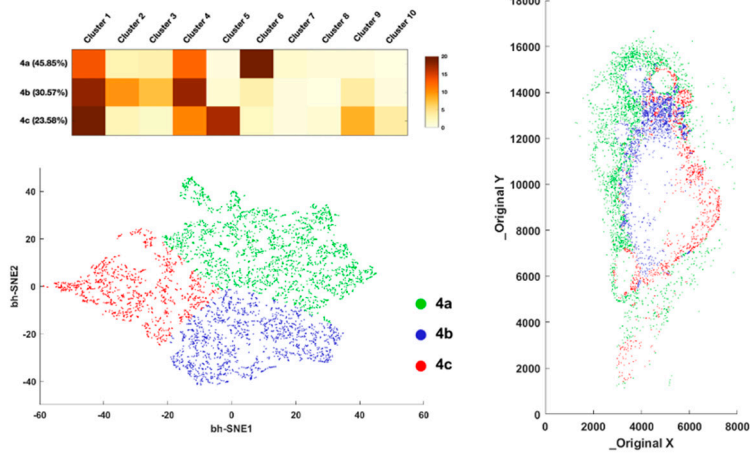

### Cell cluster 5

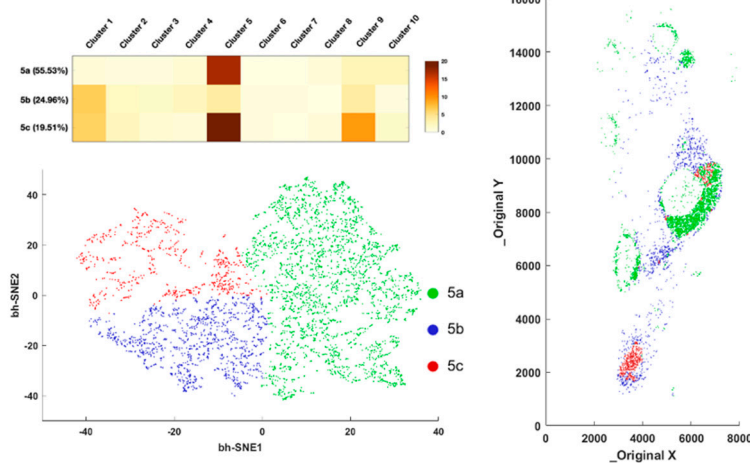

### Cell cluster 6

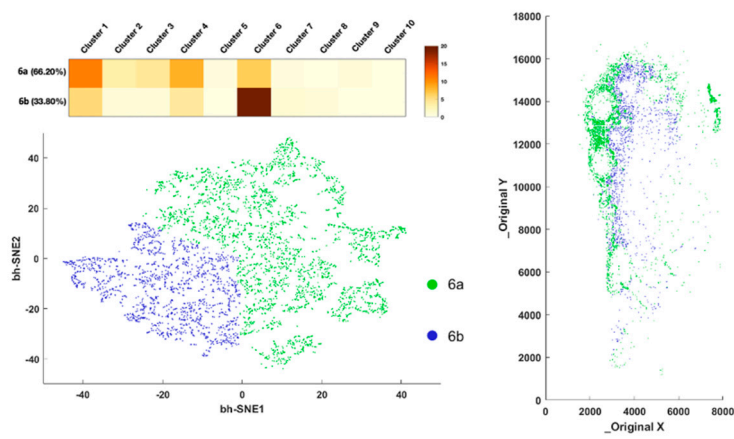



### Cell cluster 7

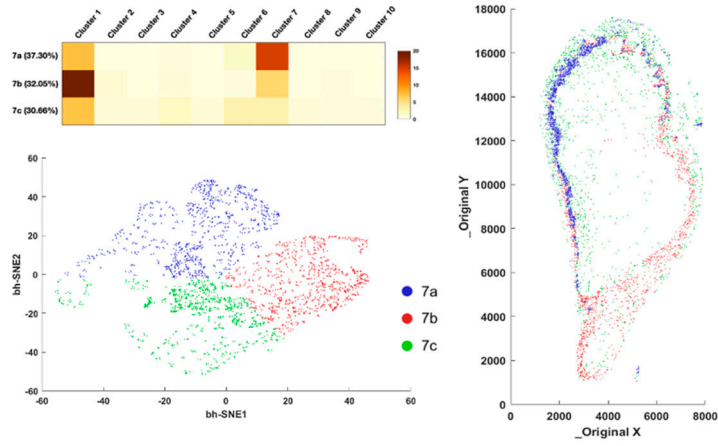

### Cell cluster 8

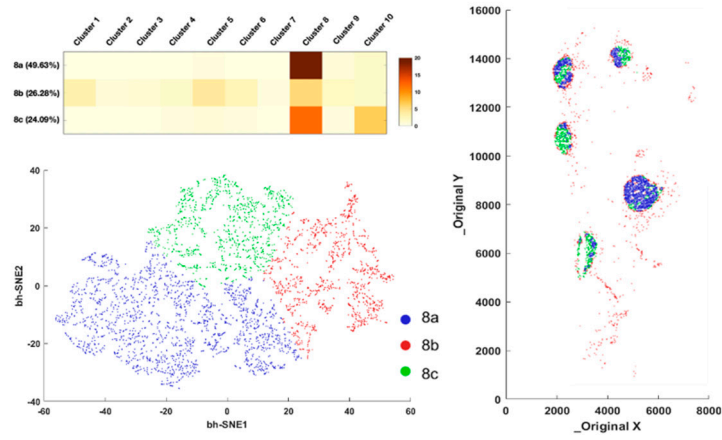

### Cell cluster 9

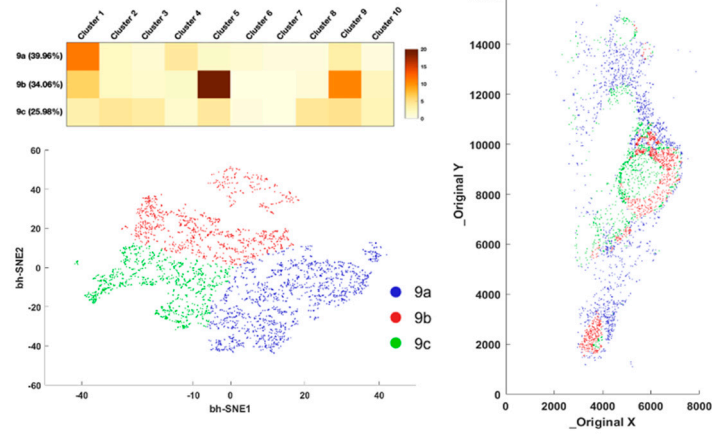

**Figure S3.** Further classification of the cells in varied microenvironment. For each cell cluster, based on their neighbor cells from different clusters (upper left), the individual cells in the every cell cluster are further partitioned into distinct sub-clusters (bottom left). The panels on the right display the anatomical locations of each cell from the different subclusters.
